1  
2  
3  
4  
5  
6  
7  
8  
9  
10  
11  
12  
13  
14  
15

**Ontogeny and social context regulate the circadian activity patterns of Lake Malawi cichlids**

Evan Lloyd<sup>1</sup>, Aakriti Rastogi<sup>1</sup>, Niah Holtz<sup>2</sup>, Ben Aaronson<sup>3</sup>, R. Craig Albertson<sup>3</sup>, and Alex C. Keene<sup>1</sup>

1. Department of Biology, College Station, TX 77840

2. Organismic and Evolutionary Biology Graduate Program, University of Massachusetts, Amherst, MA 01003.

3. Department of Biology, University of Massachusetts, Amherst, MA 01003

\* Denotes equal contribution

Address correspondence to [KeeneA@TAMU.edu](mailto:KeeneA@TAMU.edu)

## 16 **Abstract**

17 Activity patterns tend to be highly stereotyped and critical for executing many different behaviors  
18 including foraging, social interactions and predator avoidance. Differences in the circadian timing  
19 of locomotor activity and rest periods can facilitate habitat partitioning and the exploitation of novel  
20 niches. As a consequence, closely related species often display highly divergent activity patterns,  
21 raising the possibility that a shift from diurnal to nocturnal behavior, or vice versa, can occur  
22 rapidly. In Africa's Lake Malawi alone, there are over 500 species of cichlids, which inhabit diverse  
23 environments and exhibit extensive phenotypic variation. We have previously identified a  
24 substantial range in activity patterns across adult Lake Malawi cichlid species, from strongly  
25 diurnal to strongly nocturnal. In many species, including fishes, ecological pressures differ  
26 dramatically across life-history stages, raising the possibility that activity patterns may change  
27 over ontogeny. To determine if rest-activity patterns change across life stages we compared the  
28 locomotor patterns of six Lake Malawi cichlid species. While total rest and activity did not change  
29 between early juvenile and adult stages, rest-activity patterns did, with juveniles displaying distinct  
30 activity rhythms that are more robust than adults. One distinct difference between juveniles and  
31 adults is the emergence of complex social behavior. To determine whether social context is  
32 required for activity rhythms, we next measured locomotor behavior in group housed adult fish.  
33 We found that when normal social interactions were allowed, locomotor activity patterns were  
34 restored, supporting the notion that social interactions promote circadian regulation of activity in  
35 adult fish. These findings reveal a previously unidentified link between developmental stage and  
36 social interactions in the circadian timing of cichlid activity.  
37

## 38 Introduction

39

40 Animals display remarkable diversity in rest-activity patterns<sup>1,2</sup>. The timing of rest and activity can  
41 differ dramatically between closely related species, or even between populations of the same  
42 species, raising the possibility that it can be adaptive and subject to selection<sup>3,4</sup>. Indeed, circadian  
43 regulation of locomotor activity is strongly associated with many factors critical in determining  
44 organismal fitness, including foraging strategy, social behavior, and predator avoidance<sup>5,6</sup>.  
45 Further, rest-activity patterns are acutely regulated by environmental factors and life-history traits  
46 that include food availability, social interactions, and age<sup>7,8</sup>. Defining how complex environmental  
47 interactions regulate activity patterns is therefore critical to understanding behavioral adaptation  
48 and evolution.

49

50 There are over 35,000 teleost species, adapted to diverse habitats, and representing ~50% of  
51 vertebrate diversity<sup>9</sup>. Many teleosts display robust diurnal locomotor rhythms including the  
52 goldfish (*Carassius Auratus*), river-dwelling populations of the Mexican tetra (*Astyanax*  
53 *mexicanus*), and the zebrafish (*Danio rerio*)<sup>10-13</sup>. Examples of nocturnal teleosts have also been  
54 identified including the plainfin midshipman, the Senegalese sole, and the doctor fish, *Tinca*  
55 *tinca*<sup>14</sup>. Other species such as cavefish morphs of the Mexican tetra, *A. mexicanus*, and the  
56 Somalian cavefish, *Phreatichthys andruzzii*, and cave dwelling populations of *A. mexicanus* have  
57 largely lost light-driven circadian regulation of behavior<sup>15-18</sup>. Despite the characterization of  
58 species from disparate lineages/populations, few studies have examined how developmental  
59 stage, or divergent ecological contexts regulate sleep among closely related species.  
60 Understanding the variability of rest-activity patterns over phylogeny, ecology and ontogeny,  
61 therefore represents a vital step toward identifying conserved genetic and evolutionary features  
62 that may influence regulation of activity throughout vertebrates.

63

64 Lake Malawi cichlids exhibit unparalleled diversity in morphology and behavior among  
65 vertebrates<sup>19-21</sup>. Observations at night suggest that adult cichlids may be diurnal as an evolved  
66 strategy for predator avoidance, at least for species occupying near-shore habitats<sup>22</sup>. Specifically,  
67 Lake Malawi is home to endemic non-cichlid predators, including the Cornish jack *Mormyrops*  
68 *anguilloides*, which feeds in packs at night using weak electrical pulses thought to be undetectable  
69 by cichlids<sup>23</sup>. We previously analyzed the activity patterns of 11 species of cichlids, from diverse  
70 habitats and distinct genetic lineages and found significant variability ranging from highly

71 nocturnal to diurnal, with many species exhibiting no differences in day or night activity<sup>24</sup>. In a  
72 single identified nocturnal species, *Tropheops*. sp. “red cheek,” the pattern held at two life-history  
73 stages (i.e., late juvenile vs. mature adult), and under different abiotic conditions (i.e., presence  
74 vs. absence of shelter)<sup>24</sup>. However, for many species there was no preference for light or dark  
75 activity, raising the possibility that activity patterns are either context dependent or absent in some  
76 species<sup>24</sup>.

77  
78 Here, we focused on the activity patterns of Lake Malawi cichlids that seem to lack activity patterns  
79 during adulthood. All Lake Malawi cichlids are maternal mouth brooders, and we found that as  
80 newly emerged fry (i.e., early juvenile stage) all six species exhibited robust rest-activity patterns.  
81 Thus, we demonstrate ontogenic regulation of activity patterns across diverse cichlids.  
82 Furthermore, in a subset of species, we find that activity patterns of adults were largely restored  
83 under social housing conditions. Together, these studies demonstrate the complexity and context  
84 dependency of the circadian regulation of rest-activity in Lake Malawi cichlids.

85

86

## 87 **Results**

### 88 ***Total activity is similar between juvenile and adult cichlids***

89 We examined six Lake Malawi cichlids from three distinct lineages (Fig 1A). The *mbuna* lineage  
90 is phylogenetically monophyletic, with species generally inhabiting the near-shore rocky habitat.  
91 Three *mbuna* species were utilized here: *Labidochromis caeruleus* (Lundo Island),  
92 *Melanochromis heterochromis* (Mumbo Island), *Tropheops kumwera* (Kanchedza Island). All  
93 three are territorial and sexually dimorphic as adults. *Labidochromis* species are generally  
94 omnivorous, consuming both benthic invertebrates, algae, and plankton. *M. heterochromis* has a  
95 similarly omnivorous diet. *T. kumwera* feeds primarily on benthic algae<sup>25,26</sup>. *Astatotilapia calliptera*  
96 is sister to the *mbuna*, and has been called the “most generalized species in the lake”<sup>26</sup>. It’s  
97 generalist designation refers to both diet and habitat, as it one of few Lake Malawi species that  
98 inhabits the surrounding river systems. Both *Aulonocara stuartgranti* and *Nimbochromis venustus*  
99 are non-*mbuna* species, which is a polyphyletic group of cichlids that generally occupy deeper,  
100 open-water, and/or sandy habitats. *A. stuartgranti* feeds on benthic invertebrate that it locates  
101 using an enlarged lateral line system, whereas *N. venustus* is an open-water piscivore. All fish  
102 were obtained from the aquarium trade. While generation from the wild cannot be verified for  
103 these animals, breeding populations are maintained for species, and often to specific  
104 locations/populations in the lake, with new individuals introduced to the breeding pool

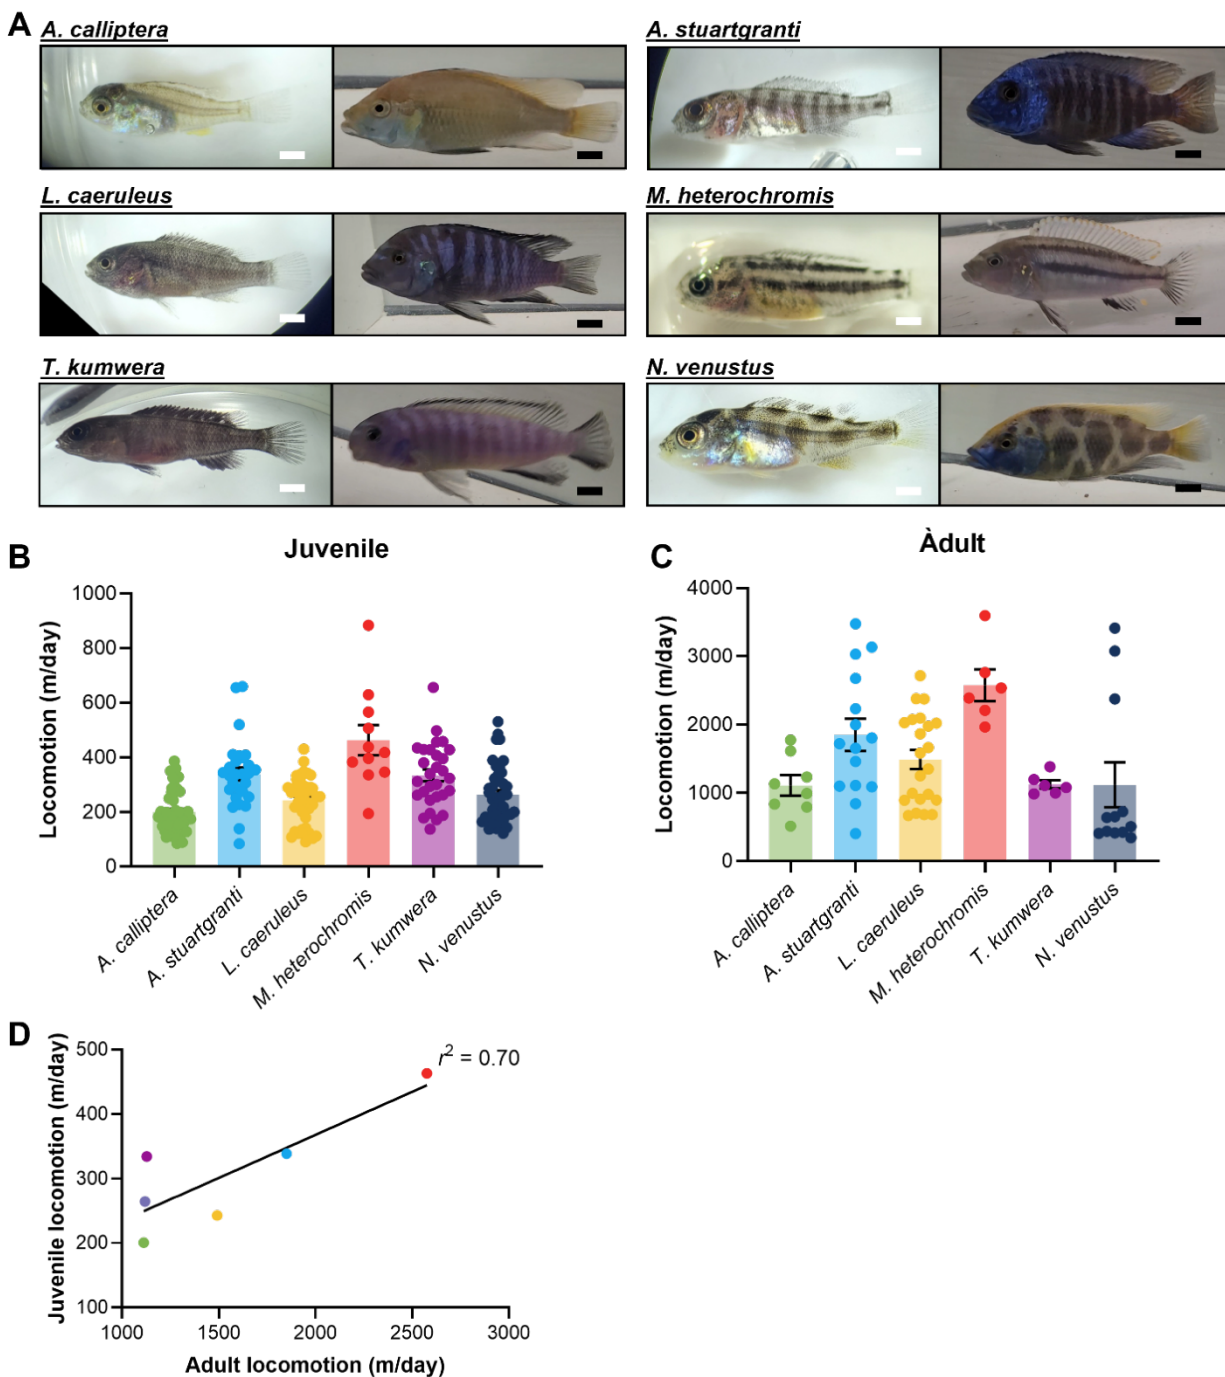

**Figure 1. Variation in cichlid activity levels is conserved throughout development.** **A.** Images of early juvenile (left) and adult (right) cichlid species used in the present study. Juveniles were tested and photographed between 3-4 weeks post-fertilization, shortly after the depletion of the yolk sac and at the earliest free-swimming stage. Adults were tested and photographed at full maturity, after the development of nuptial colors. White Scale Bar (Juveniles) = 1 mm. Black Scale Bar (Adults) = 1 cm. **B.** Total locomotion of juvenile cichlids over a 24 hour period. There is significant variation in total locomotion in juvenile cichlids (ANOVA:  $F_{5, 190} = 15.99, p < 0.0001$ ). **C.** Total locomotion of adult cichlids over a 24 hour period. There is significant variation in total locomotion in adult cichlids (ANOVA:  $F_{5, 67} = 6.42, p < 0.0001$ ). **D.** Correlation between 24-hour locomotion in juveniles and adults. There is a significant correlation between juvenile and adult locomotion ( $r^2 = 0.70, p = 0.0388$ )

106 to maintain genetic health.

107

108 To measure activity in cichlids we used systems similar to those established in other fish species  
109 including zebrafish and *A. mexicanus*<sup>27-29</sup>. For juveniles, we used 6-well tissue culture plates,  
110 whereas adults were filmed in 2.5-gallon glass aquaria. Following 24 hours of acclimation,  
111 individually housed fish were filmed for a 24 hour period under standard 14 hr light: 10 hr dark  
112 conditions. We noted significant variation in total activity with and between species of juvenile and  
113 adults (Fig. 1B, C). For example, *A. calliptera* was the least active in both juveniles and adults,  
114 while *M. heterochromis* had the highest activity levels at both stages, suggesting total activity is  
115 conserved across developmental stages (Fig 1B,C). To directly test this notion, we examined the  
116 relationship between total activity in juveniles and adults. A regression revealed a strong positive  
117 relationship ( $r^2=0.70$ ,  $p=.038$ ) across species between juvenile adult locomotor activity (Fig 1D).  
118 Together, these data reveal significant inter-species variation that remains constant across the  
119 life cycle.

120

### 121 ***Juvenile cichlids exhibit robust activity patterns compared to adults***

122 We next sought to understand whether rest-activity patterns changed between life-history stages.  
123 In juveniles, we identified robust activity patterns across all six species tested (Fig 2A,C). In total  
124 there were four diurnal species (*A. calliptera*, *L. caeruleus*, *M. heterochromis*, and *T. kumwera*)  
125 and two nocturnal species (*A. stuartgranti* and *N. venustus*). Conversely, there were no significant  
126 differences between day and nighttime activity across all six species when tested during  
127 adulthood (Fig 2B,D). These results were confirmed when we computed a diurnality index, which  
128 compares daytime to nighttime activity in individual fish (Fig 2E)<sup>24</sup>. There was significantly more  
129 time-of-day activity preference in five of the six species tested (Fig 2E). Thus, activity patterns  
130 appear to be more robust in early juvenile cichlids compared to adult fish under individually  
131 housed conditions.

132

133 Across taxa, the timing of behavioral quiescence or rest are modulated by the circadian clock and  
134 linked to daily activity patterns<sup>3,4</sup>. To examine whether the timing of rest differs across life stages,  
135 we therefore compared rest periods of one minute or longer, a timeframe of inactivity that is used  
136 to define sleep in related species<sup>30</sup>. There were robust differences in total rest across juvenile and  
137 adult species (Fig 3A-D). Similar to the analysis of activity, there was consistency in the duration  
138 of rest between juveniles and adults. For example, *M. heterochromis* had the lowest levels of rest  
139 in juveniles and adults, whereas *A. calliptera* and *N. venustus* had the highest level at both

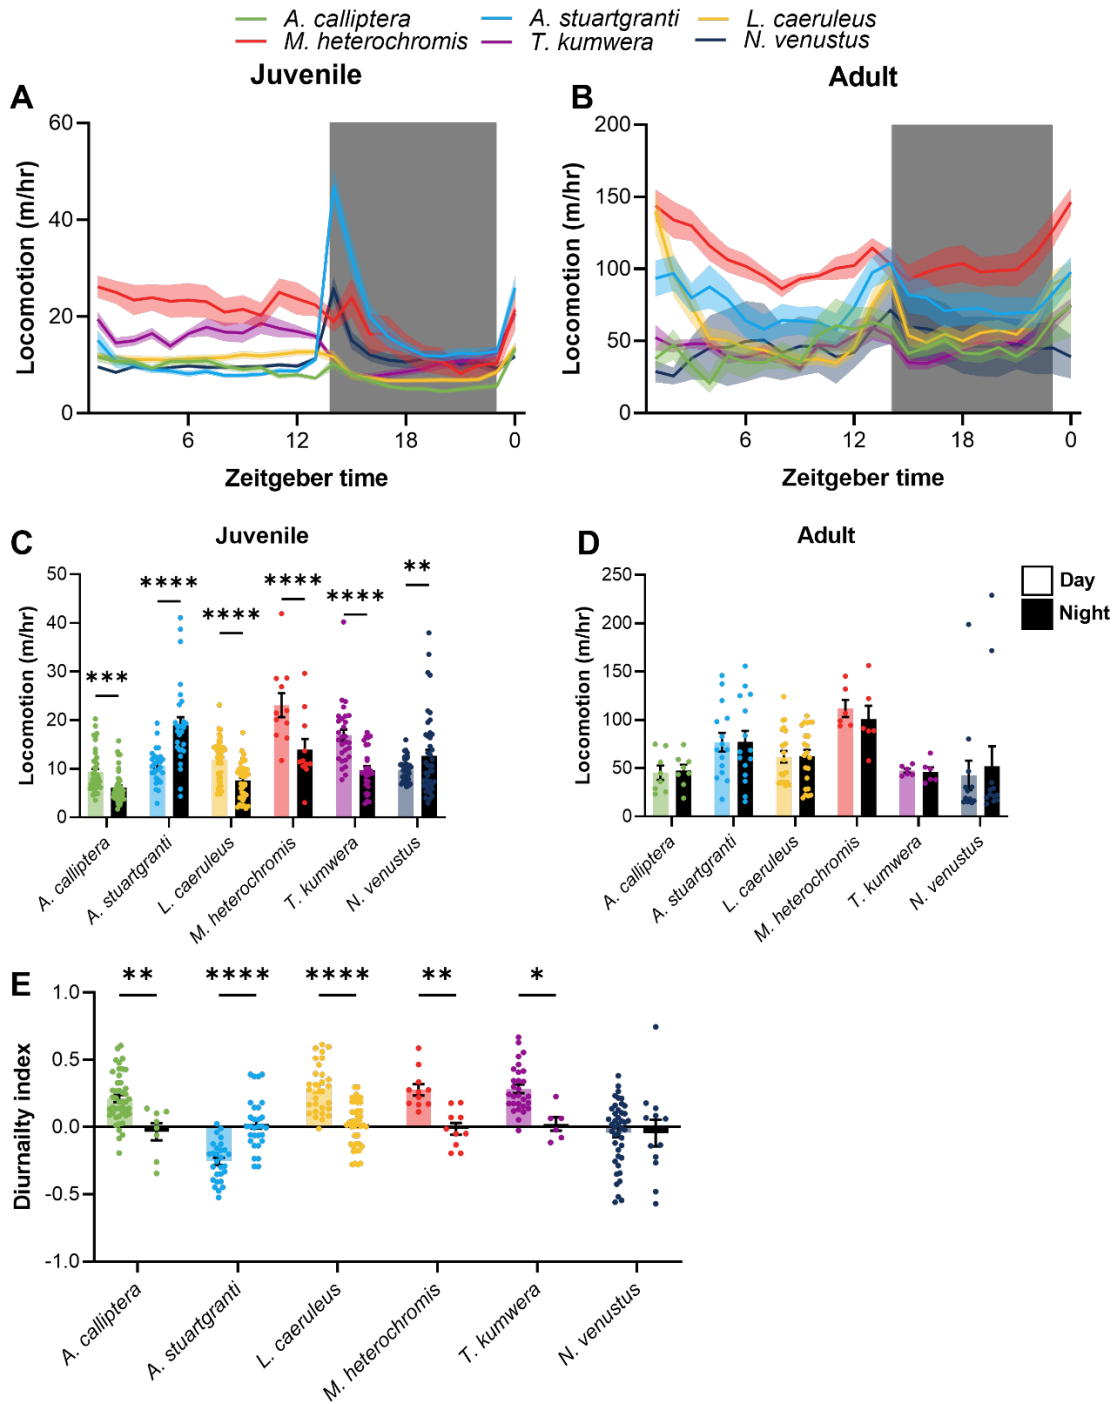

**Figure 2. Ontogeny of behavioral rhythms in locomotion.** **A.** Locomotion profiles of juvenile cichlids over 24 hours. Shaded area indicates dark period. **B.** Locomotion profiles of adult cichlids over 24 hours. Shaded area indicates dark period. **C.** Average hourly locomotion of juvenile cichlids during the day and night. Juvenile cichlids exhibit diurnal (*A. calliptera*, *L. caeruleus*, *M. heterochromis*, *T. kumwera*) or nocturnal (*A. stuartgranti*, *N. venustus*) activity patterns (two-way ANOVA:  $F_{5,190} = 36.54$ ,  $p < 0.0001$ ). **D.** Average hourly locomotion of juvenile cichlids during the day and night. Adult cichlids lack behavioral rhythms when tested in isolation. **E.** Strength of behavioral rhythms in juvenile and adult cichlids. 1 indicates total diurnality, -1 indicates total nocturnality. Behavioral rhythms are present in juveniles but not adults (two-way ANOVA:  $F_{5,280} = 16.20$ ,  $p < 0.0001$ ).

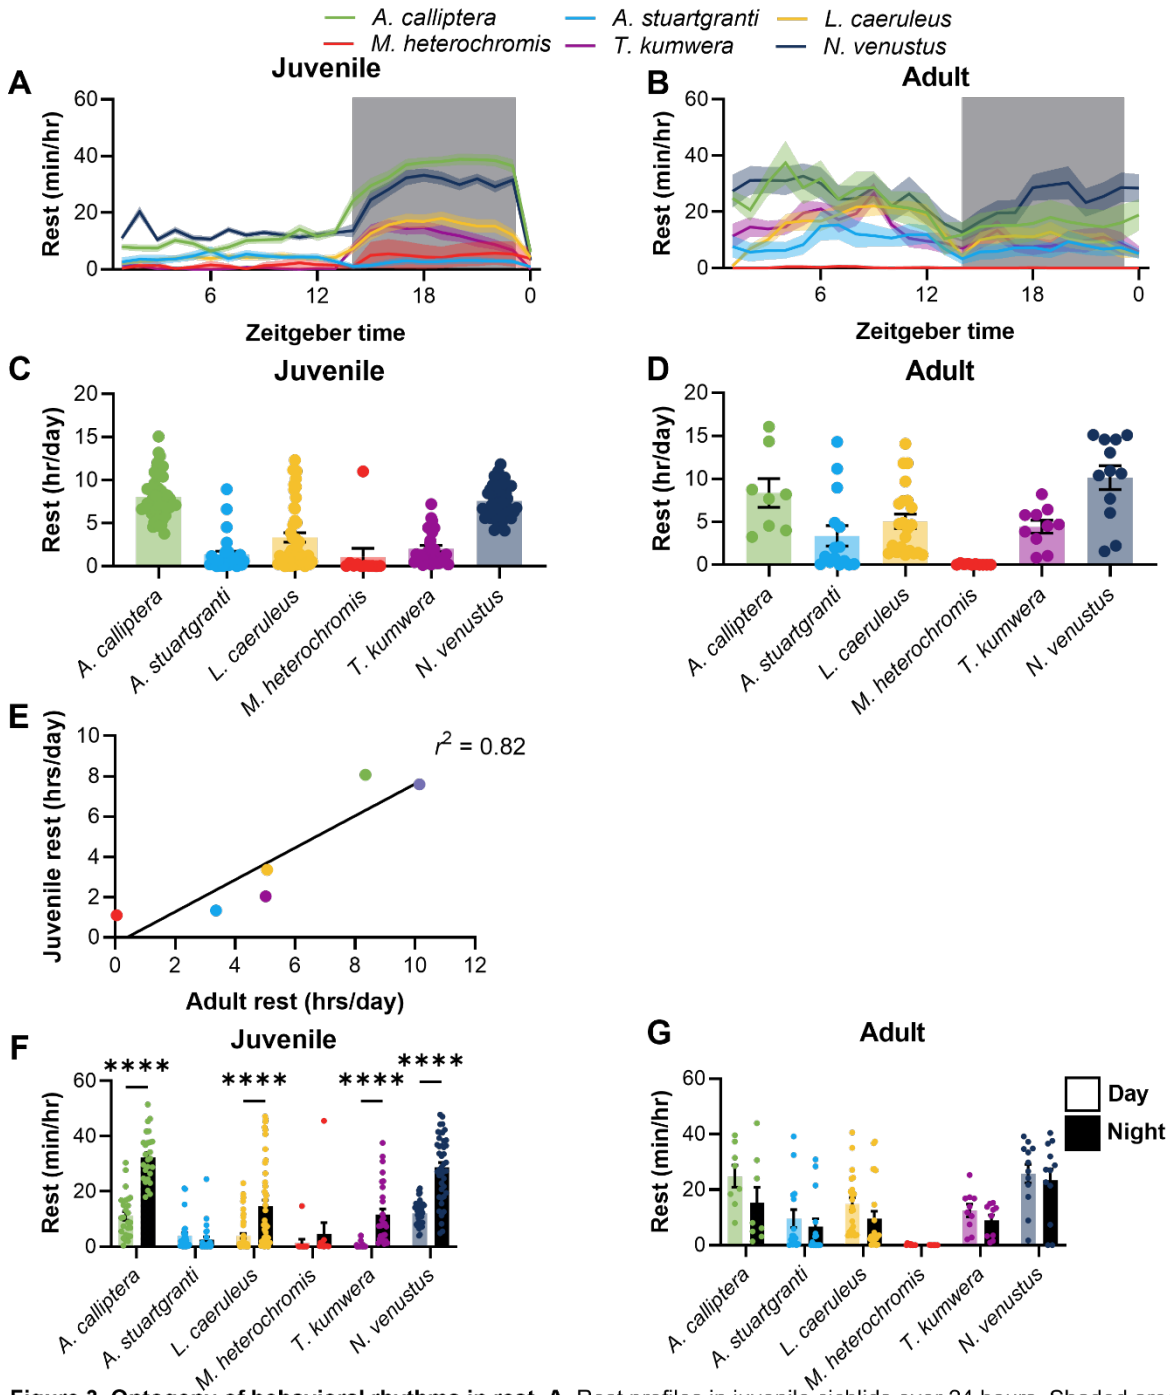

**Figure 3. Ontogeny of behavioral rhythms in rest.** **A.** Rest profiles in juvenile cichlids over 24 hours. Shaded area indicates dark period. **B.** Rest profiles in adult cichlids over 24 hours. Shaded area indicates dark period. **C.** Total rest amounts over 24 hours in juvenile cichlids. There is significant variation in total rest amount in juvenile cichlids. (ANOVA:  $F_{5, 190} = 42.4, p < 0.0001$ ). **D.** Total rest amounts over 24 hours in adult cichlids. There is significant variation in total rest amount in adult cichlids (ANOVA:  $F_{5, 67} = 8.792, p < 0.0001$ ). **E.** Correlation between juvenile and adult rest amounts. There is significant correlation between juvenile and adult rest ( $r^2 = 0.82, p < 0.0128$ ). **F.** Average hourly rest amount of juvenile cichlids during the day and night. Juvenile cichlids exhibit diurnal (*A. calliptera*, *L. caeruleus*, *T. kumwera*, *N. venustus*) or nocturnal (*A. stuartgranti*) rest patterns (two-way ANOVA:  $F_{5, 358} = 10.95, p < 0.0001$ ). **G.** Average hourly rest amount of adult cichlids lack behavioral rhythms in rest amount.



142 developmental stages. Indeed, a regression analysis revealed a strong relationship ( $r^2=0.82$ ,  
143  $p=0.012$ ) between juvenile and adult rest duration (Fig 3E). Therefore, the duration of total rest is  
144 maintained throughout development across multiple species of cichlids.

145  
146 We next compared the amount of rest over the light and dark periods. Juvenile *A. calliptera*, *L.*  
147 *caeruleus*, and *T. kumwera* displayed robust patterns in rest regulation with increased nighttime  
148 rest, while the fourth diurnal species *M. heterochromis* trended in the same direction (Fig 3F),  
149 suggesting diurnality is associated with periods of nighttime rest in juvenile cichlids. Conversely,  
150 there were no differences in the timing of rest for *A. stuartgranti*, suggesting that nocturnality in  
151 this species is driven by swimming velocity during wakefulness, rather than the timing of rest (Fig  
152 3F). Finally, in *N. venustus*, which is nocturnal at the juvenile stage, there is robust consolidation  
153 of rest during the night (Fig 3F). For all species tested there was little difference between daytime  
154 and nighttime rest in adults (Fig 3G). To understand this trait, we calculated a crepuscularity index,  
155 which measures the ratio of activity immediately after the light transitions relative to the rest of the  
156 day. We saw notable variation across species in this measurement, with *N. venustus* and *A.*  
157 *stuartgranti* displaying the highest degree of crepuscularity, increasing activity levels by up to two  
158 fold in the hours following light transitions; other species showed little to no crepuscular  
159 tendencies (Fig S1A). Similar to day-night behavioral rhythms, crepuscular behavior was largely  
160 lost in adulthood (Fig S1B).

161  
162 There were no day-night differences in rest across all six populations of adult cichlids, again  
163 confirming that the timing of rest-activity is more robust in juveniles than adult fish (Fig 3G).  
164 Together, these findings support the notion that rest-activity bouts are more readily consolidated  
165 in juvenile fish and reveal separate mechanisms for the emergence of diurnal, nocturnal, and  
166 crepuscular activity patterns.

### 167 168 **Social housing can restore diurnal activity in adults**

169 Many fish species, including cichlids, are highly social, with animals displaying behavioral  
170 differences under solitary and group housing<sup>31–35</sup>. Except for a small number of studies, nearly  
171 all analysis of rest-activity patterns in fishes have used individually housed animals, including  
172 cichlids. Social interactions are weaker in juvenile fish, compared to adults, raising the possibility  
173 that the lack of rest-activity patterns in adults is an artifact of solitary housing conditions. To  
174 examine the effects of social housing on rest-activity patterns we measure activity patterns in  
175 group housed cichlids comprised of two adult males and four adult females (Fig 4A). All fish were

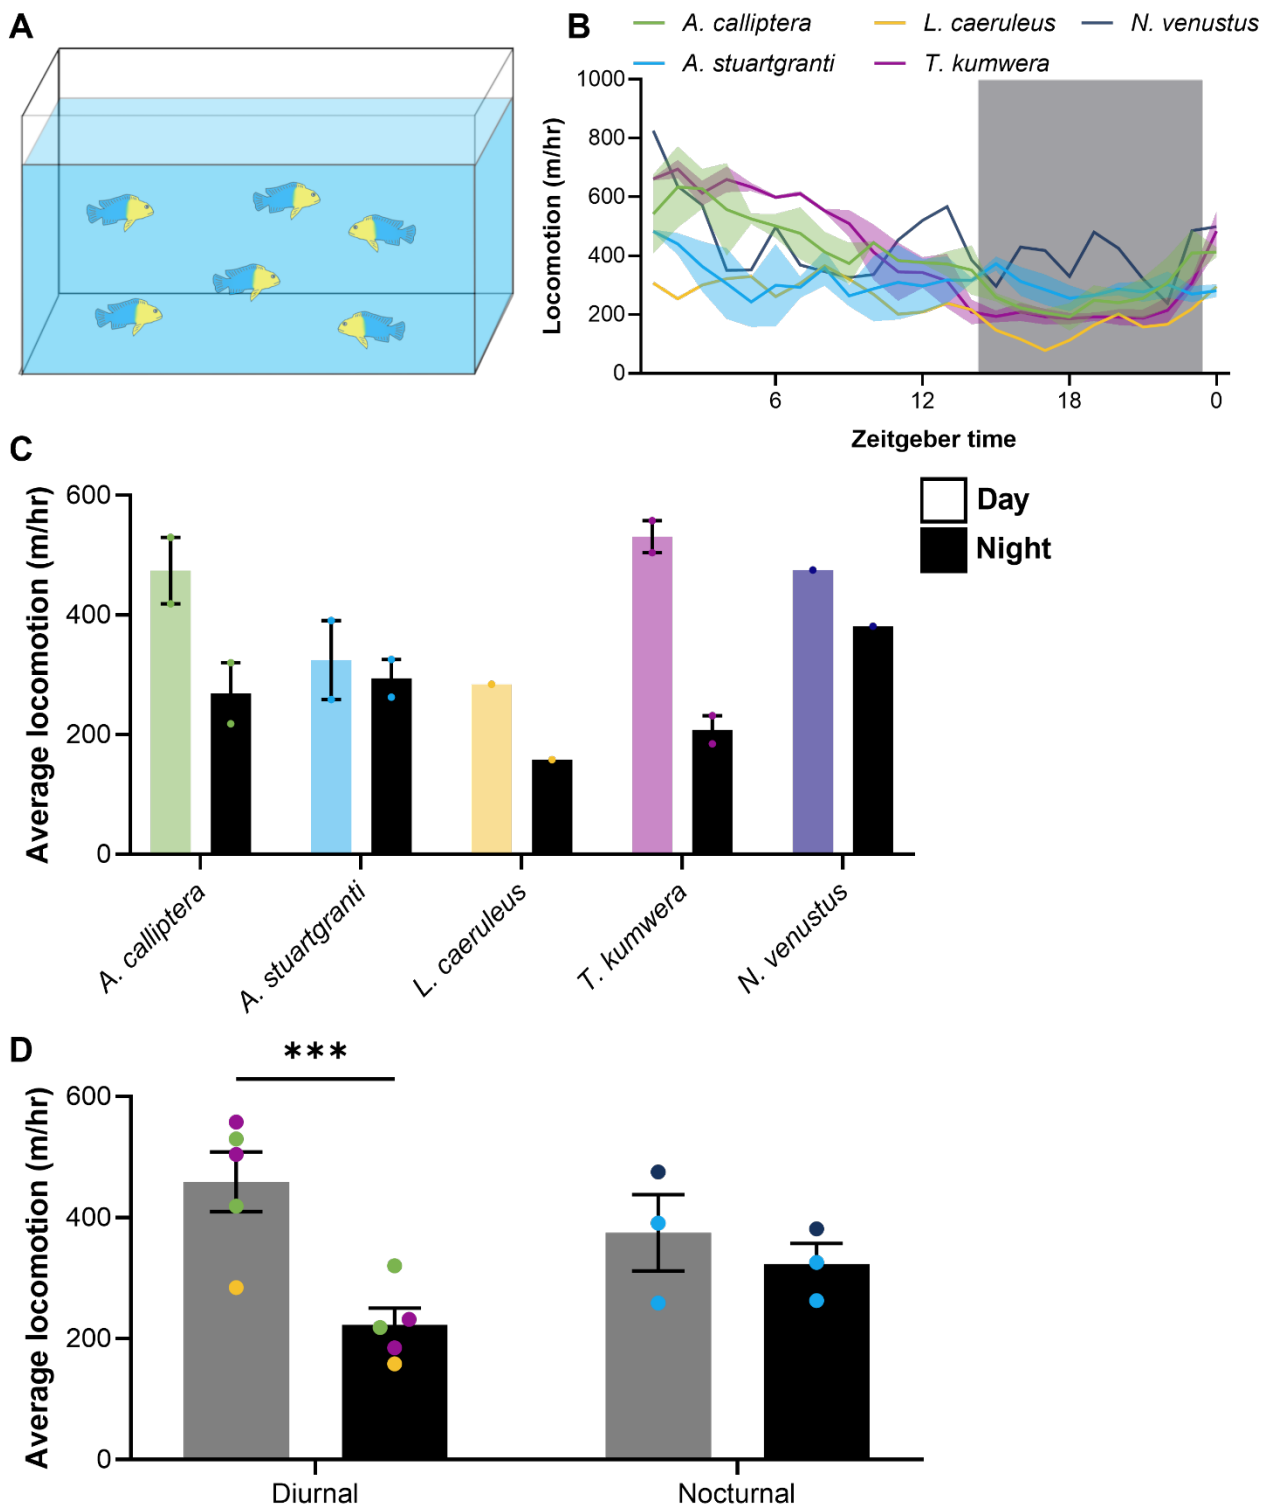

**Figure 4. Social context restores rhythms in diurnal cichlids.** **A.** Schematic of test setup. Adult cichlids are transferred to a 10-gallon testing aquarium, acclimated overnight, and then recorded for 24 hours. **B.** Average locomotion of cichlid groups over 24 hours. Shaded area indicates dark period. **C.** Average hourly locomotion of group housed cichlids, during the day and night. **C.** Average hourly locomotion of group housed cichlids during the day and night, grouped into diurnal and nocturnal species. Group housing restores rhythmic behavior in diurnal, but not nocturnal species (two-way ANOVA:  $F_{1,6} = 11.23$   $p = 0.0154$ ). Colors of data points indicate species.

177 transferred into testing tanks and given 24 hours to acclimate and establish stable social  
178 interactions. We tested four different cichlid species under group-housed conditions for 24 hours.  
179 While we were unable to track individual fish reliably over the 24 hour period, we used average  
180 activity of the group. Three of these species tested (*A. calliptera*, *L. caeruleus*, and *T. kumwera*)  
181 trended towards recovery of diurnal behavior (Fig 4C). There was little difference in the species  
182 *A. stuartgranti* or *N. venustus*, which are nocturnal as juveniles. To examine the broader trends  
183 of sleep in group housed fish we combined analysis of nocturnal and diurnal species. Social  
184 housing induced robust diurnality in species that are diurnal as juveniles, while there was no  
185 differences between day and night activity in the two nocturnal species (Fig 4D). These findings  
186 suggest diurnal juveniles species likely maintain activity patterns in adulthood, but the fish only  
187 display these behaviors under group-housed conditions.

188  
189 To examine the behavior of individual fish in more detail, we manually annotated behavior for a  
190 single species over the full 24 hour testing period. We chose to examine *L. caeruleus* because of  
191 their robust diurnal behavior as group-housed adults and juveniles. Fish behavior was manually  
192 analyzed in Behavioral Observation Research Interactive Software (BORIS) for active swimming  
193 over the 24 hour cycle<sup>36</sup>. We developed an ethogram across all six fish with rest-activity timing  
194 (Fig 5A). We observed robust diurnal activity across all male and female individuals (Fig 5B,C).  
195 Further, the duration of rest bouts was greater during the night period (Fig 5D,E). These findings  
196 confirm that diurnality is not sex-specific, and generalizable across the dominance structure.

197

198

## 199 **Discussion**

### 200 ***The importance of context in behavioral studies***

201 The genetic, morphological, and behavioral diversity of African cichlids provides an exceptional  
202 model for understanding trait evolution<sup>19</sup>. In spite of myriad comparative studies in this system,  
203 very few have focused on rest-activity patterns. Here, we characterize the behavior of six species  
204 of Lake Malawi cichlids at multiple developmental stages, highlighting a role for ontogeny and  
205 social context in the regulation of activity. Previously, we characterized rest-activity patterns in 11  
206 species of Lake Malawi cichlids at the late juvenile, or sub-adult stage, identifying 7 species  
207 without activity preferences, as well as two diurnal species and one nocturnal species<sup>24</sup>. The lack  
208 of activity preferences across the majority of species was surprising given the ubiquity of circadian  
209 rhythms and the robust diurnal or nocturnal behaviors across many species of animals that have  
210 been studied to date. Here, we examined species that also seemed to lack robust activity patterns  
211 as adults, but showed that these behaviors are present when animals were examined at an early

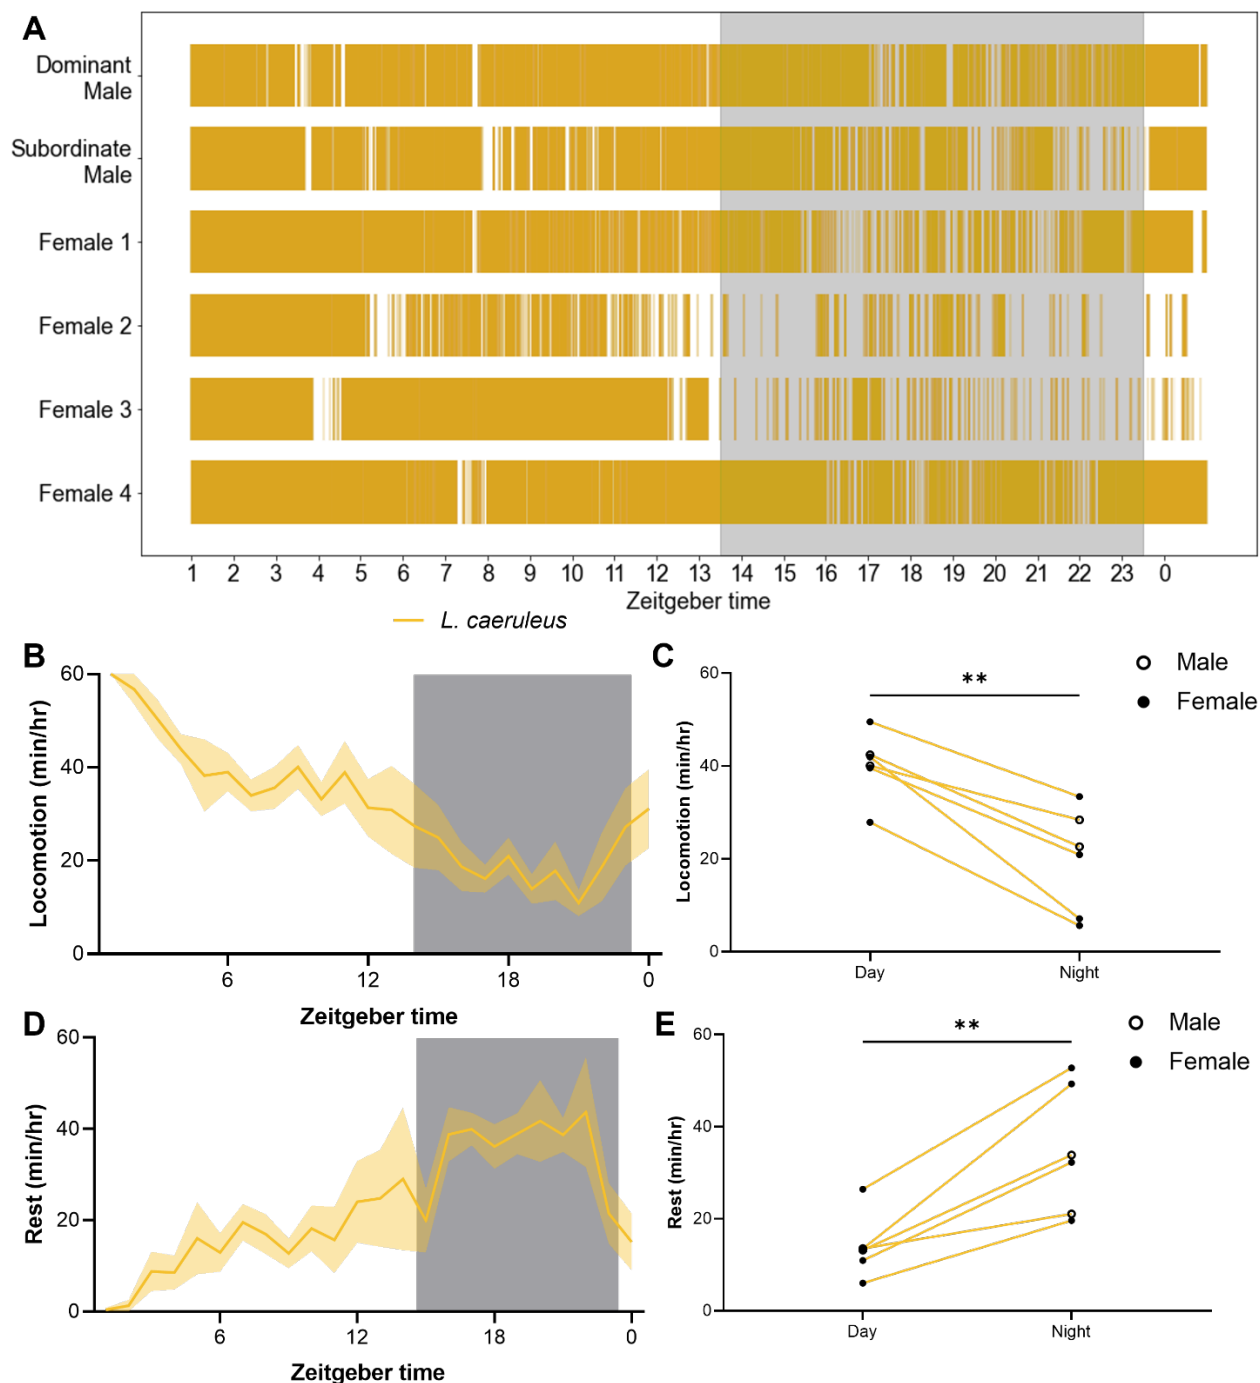

**Figure 5. Individual variation in behavioral rhythms in a social context.** **A.** Ethogram of active swimming behavior of *L. caeruleus* over 24 hours, in a social context. Colored regions indicate periods of active swimming. Shaded area indicates dark period. **B.** Profile of locomotion in group housed *L. caeruleus*, quantified as minutes of active swimming per hour. Shaded area indicates dark period. **C.** Average hourly locomotor activity of group housed *L. caeruleus* during the day and night. Group housed *L. caeruleus* are significantly more active during the day (Paired t-test:  $t_5 = 6.413$ ,  $p = 0.0014$ ). **D.** Rest profile of group housed *L. caeruleus* over 24 hours. Shaded area indicates dark period. **E.** Average hourly rest of group housed *L. caeruleus* during the day and night. Group housed *L. caeruleus* consolidate rest during the dark period (Paired t-test:  $t_5 = 5.198$ ,  $p = 0.0035$ ).

213 juvenile stage or within a social context. Of note, *T. kumwera* showed diurnal activity patterns in  
214 our previous study, when tested at the sub-adult stage. Here, we found that this behavioral rhythm  
215 is present from the earliest developmental timepoints, but is lost by the onset of sexual maturity.  
216 However, placing the adult fish in a social context restored diurnal rhythmicity, underscoring the  
217 importance of a social context for maintenance of behavioral rhythms in this species. These  
218 findings highlight the complexity of animal behaviors, and suggest that many of the species  
219 previously examined may possess innate activity rhythms when examined in a different context.

220

221 The role of circadian and sleep regulators across development remains poorly understood. For  
222 example, in humans sleep varies significantly across the life cycle but little is known about the  
223 factors that regulate pediatric sleep<sup>37</sup>. In fruit flies, genes regulating sleep and activity in larvae  
224 differ from those regulating sleep in adult flies suggesting that the genetic basis of the  
225 consolidation of activity patterns is specific to developmental stages<sup>38,39</sup>. Here we find that total  
226 locomotor activity and duration of rest appear to be robust to life-history stage, whereas the timing  
227 of rest-activity patterns is dependent upon ontogeny, raising the possibility that there are genetic  
228 and contextual differences regulating the timing, but not the amount of activity. The cichlid species  
229 examined here reach sexual maturity at ~6 months. This stage is associated by an increase in  
230 sex-specific hormones that is associated with aggression, territoriality, mating behaviors, and  
231 dominance hierarchies<sup>40</sup>. The gain of these behaviors seems to be associated with the loss of  
232 activity pattern robustness, suggesting that natural social conditions are required for the  
233 expression of diurnal or nocturnal rhythms. Whether the lack of rhythms in individually housed  
234 adults is due to the lack of a necessary environmental cue, or represents a secondary stress  
235 response remains unclear. Taken together, our data suggests that understanding the rest-activity  
236 patterns in adults will require further testing in diverse ethological contexts.

237

238 It is notable that total rest-activity appears to be robust to life-history stage, which suggests that it  
239 is more hard-wired compared to rest-activity patterns. If true this would suggest greater potential  
240 to modulate activity rhythms as populations face new environmental and/or social contexts. Our  
241 findings suggest the evolution of highly disparate locomotor patterns, diurnality and nocturnality,  
242 are influenced by environmental/social context. These findings raise the possibility that the  
243 evolution of complex social behaviors co-evolve with rest-activity patterns to contribute to the  
244 regulation of circadian behavior.

245

246

## 247 **Biological mechanisms of circadian regulation**

248 The hypothalamus is the primary regulator of circadian behavior and outputs from the  
249 suprachiasmatic nucleus are thought to convey diurnal or nocturnal behavior<sup>41,42</sup>. In zebrafish, the  
250 SCN contains core-transcriptional clock genes common in mammals suggesting a conserved  
251 function in the regulation of locomotor patterns, although the presence of many light-responsive  
252 tissues in teleosts suggests clock regulation may be more complicated than in mammals<sup>41</sup>. In  
253 *Drosophila* through mammals social interactions contribute to the regulation of sleep and  
254 circadian behavior. In mammals, social interactions impact clock entrainment. For example, social  
255 defeat decreases the amplitude of the core-clock gene *Per2* in the periphery, as well as sleep  
256 homeostasis<sup>43,44</sup>. There is reduced complexity of social interactions in young juvenile fish that  
257 displayed robust rhythms<sup>35,45</sup>. However, we find that activity patterns are absent in individually  
258 housed adult fish. These findings raise the possibility that unlike mammals, stress that impairs  
259 circadian function comes from solitary housing, rather than social stress. Indeed, in *Drosophila*  
260 solitary housing is associated with sleep dysregulation and disruption of circadian gene  
261 expression<sup>46,47</sup>. Understanding both the SCN outputs, and how they are modulated by social  
262 context provides a mechanism for understanding how context-dependent regulation of activity  
263 patterns evolved. Our findings raise the possibility that these outputs are modulated by social  
264 circuits, or other context-specific regulators of behavior.

265

266

## 267 **Adaptive significance**

268 Development of diversity in behavioral rhythms in cichlids may be a type of habitat partitioning,  
269 with cichlid species altering the timing of their behaviors to take advantage of reduced competition  
270 for resources such as food and territory<sup>24</sup>. The presence of larger nocturnal predators in Lake  
271 Malawi, such as the Cornish Jack *Mormyrops anguilloides*, presents a constraint to this  
272 adaptation, requiring nocturnal cichlids to develop strategies for avoiding predation at night<sup>23</sup>. It  
273 has been previously reported that *A. stuartgranti* possesses widened lateral line canals which  
274 enable them to detect prey in the dark, but this same adaptation may also enable detection and  
275 evasion of predators during the dark period<sup>48</sup>. It is interesting that both nocturnal species are also  
276 crepuscular, and both are predatory. There is evidence that predator-prey interactions are highest  
277 during the twilight hours, and crepuscularity may be an adaptation in predators to facilitate access  
278 to both day-active and night-active prey<sup>49,51</sup>. Also notable is that neither species recovered  
279 rhythmicity when placed in a group context. This may reflect differences in the level of social  
280 interaction in these fish in the wild, such that it is not group context, but rather a yet unidentified

281 factor that is required for adult activity rhythms. It is also possible that rest-activity rhythms are  
282 truly lost in these species over ontogeny. In short, there is still much to learn about the regulation  
283 of activity patterns in this system, and testing hypotheses about the adaptive significance of these  
284 behaviors will require the application of phylogenetic methods on a much larger sampling of taxa.

285

286

## 287 **Challenges and Future Directions**

288 It has been found that changes in not just light quantity, but also composition (color), occur during  
289 twilight, and that the circadian clock machinery is responsive to this change<sup>50,52</sup>. Because our  
290 study used constant levels of white light throughout the day, we were unable to evaluate the  
291 effects of changes in light quality on behavioral rhythms; future studies may address this question  
292 by using simulated dusk/dawn transitions.

293

294 The duration of circadian experiments provide a significant challenge for analyzing data across  
295 multiple species. Here, we used multiple approaches to quantify locomotor activity in group-  
296 housed fish. First, we used Ethovision to track total activity. While this system is capable of  
297 tracking individual fish in a shared arena, the tracks regularly cross-over preventing  
298 measurements of activity in individuals over a 24 hour period. To identify the activity of individuals  
299 we visually quantified behavior using BORIS. While this approach allows for reliable behavioral  
300 measurements in individual fish it lacks precise quantification. Given the time-consuming nature  
301 of the analysis, we only analyzed a single experiment of six fish. Recent development in  
302 automated tracking including DeepLabCut and IDTracker may provide applications for long-term  
303 automated tracking<sup>53,54</sup>. These systems have been effectively applied to measure social behaviors  
304 and activity in populations of animals<sup>53,55</sup>. Further, we have tracked large groups of *A. mexicanus*  
305 to examine social interactions<sup>32</sup>. While these applications have yet to be applied to long-term  
306 analysis of rest-activity patterns the rapid improvements in processing speed and accuracy are  
307 likely to allow for analysis of sleep and circadian regulation of activity under social contexts.

308

309 It is widely recognized that rest-activity patterns are regulated by many life-history and  
310 environmental traits<sup>56,57</sup>. The growing use of animal models in rest-activity regulation has provided  
311 unprecedented insight into the genetic, neural and evolutionary processes that govern these  
312 behaviors. However, the vast majority of studies still test animals under individually housed  
313 conditions because it provides a simpler method of data acquisition and the removal of variables  
314 that may impact behavior. The results of this study suggest that developmental stage and

315 environmental conditions can have profound effects on behavioral regulation, and highlight the  
316 need for a more thorough investigation of social influences and other factors that may play a role  
317 in regulation of behavior.

318

319

## 320 **Materials and Methods**

### 321 **Fish husbandry**<sup>37,38</sup>

322 Cichlids used for experiments were reared following standard protocols approved by the Texas  
323 A&M University Institutional Animal Care and Use Committee. Cichlids were housed in the Keene  
324 fish facilities at Texas A&M University at a water temperature of 28.5°C, on a 14 h:10h light:dark  
325 cycle. Adult cichlids were fed TetraMin tropical flakes (TetraMin) twice a day. Juvenile cichlids  
326 were fed live *Artemia* brine shrimp twice daily.

327

### 328 **Fish breeding**

329 Breeding was facilitated by the inclusion of clay pots in the cichlid's home tanks, which provided  
330 arenas for mating behaviors. Breeding occurred spontaneously, and females were periodically  
331 visually inspected for an enlarged buccal cavity, evidence of fertilized eggs. For experiments  
332 testing the behavior of naturally emerged juveniles, mouthbrooding females were isolated and  
333 their tank was checked daily for the emergence of juveniles. Upon emergence, juveniles were  
334 transferred to the experimental setup immediately. For all other experiments, mouthbrooding  
335 females were allowed to carry their embryos until the hatching stage (approximately 3-5 days). A  
336 waiting period prior to extraction increased survival rates of the offspring in our hands.

337

338 To extract fertilized eggs, the mouthbrooding female was transferred to a holding tank and briefly  
339 restrained by hand, while the mouth was gently opened with the pad of the thumb. The buccal  
340 cavity was gently stroked to facilitate egg removal. Following extraction, the female was returned  
341 to her home tank, and the eggs were transferred to a 1000mL capacity Erlenmeyer flask (VWR,  
342 10545-842) with an air stone bubbler to maintain oxygen levels. Eggs were left to develop until  
343 free-swimming, and the yolk mostly depleted (approximately 3-4 weeks), at which point they were  
344 transferred to the experimental setup immediately.

345

### 346 **Behavior measurements**

347 For experiments testing locomotor activity in juvenile fish, juveniles were transferred to individual  
348 wells of 6-well culture plates (Falcon, 353046), and placed on a light box constructed of white 1/8"



349 high-density polyethylene plastic (TAP Plastics), which allowed for even diffusion of light to  
350 facilitate automated tracking. Light boxes were lit from below with infrared light, using 850 nm  
351 LED strips (Environmental Lights). Fish were acclimated to the testing chambers overnight;  
352 behavioral recording began the following day at ZT1, and ran for 24 hours. Juveniles were filmed  
353 from above, at 15 frames per second with a USB camera (LifeCam Studio 1080p, Microsoft),  
354 modified to remove the IR-blocking filter, and with an IR-pass filter (Edmund optics, 43-948) added  
355 to ensure consistent lighting during the light and dark periods.

356  
357 For experiments testing locomotor activity in isolated adult fish, adults were transferred to 2.5  
358 gallon tanks (Carolina Biological Supply, 671226), fitted on the floor and walls with custom-cut  
359 white corrugated plastic (3mm thick), allowing for even diffusion of light to facilitate automated  
360 tracking. Tanks were lit from behind with infrared light. Fish were acclimated to the testing  
361 chambers overnight; behavioral recording began the following day at ZT1, and ran for 24 hours.  
362 Adults were filmed from the side, with the same recording equipment described above.

363  
364 For experiments testing locomotor activity in group-housed adult fish, adults were transferred to  
365 10 gallon tanks (Carolina Biological Supply, 671230), fitted on the floor and walls with custom-cut  
366 white corrugated plastic, and lit from behind with infrared light. Fish were acclimated to the testing  
367 chambers overnight; behavioral recording began the following day at ZT1, and ran for 24 hours.  
368 Each group consisted of 2 male and 3-4 female conspecifics.

369  
370 **Automated behavioral tracking**  
371 Acquired videos were processed in Ethovision XT 15 (Noldus), and positional data over the 24  
372 hour period was extracted and analyzed using a custom-made Python script (v 3.11.3) to calculate  
373 locomotor activity on an hourly basis. Analysis of rest patterns was carried out as previously  
374 described<sup>24</sup>, with a threshold of 4 cm/s for adults, and 12 cm/s for juveniles. Bouts of inactivity  
375 greater than 60 seconds were considered rest.

376  
377 For group housed experiments, locomotor activity was calculated using Ethovision's Social  
378 Interaction Module (Noldus). Due to limitations of the software, the identities of individual fish  
379 could not be maintained over the 24 hour period, so the average locomotion within each group  
380 was used for subsequent analysis.

381  
382 **Manual behavior scoring**

383 To assess individual behavioral rhythms within group housed cichlids, a single 24-hour video was  
384 manually scored in BORIS, an interactive behavior logging software<sup>36</sup>. Active swimming behavior  
385 was logged as a state event (on/off), according to the following criteria: “Focal fish can be seen  
386 actively swimming with appendicular movements even though the pace may change throughout  
387 the duration of one bout of movement”. A full 24 hours was logged for each fish (N=2 males, N=4  
388 females) in a single video. The identity of the dominant male was determined by his larger size  
389 and nuptial coloration pattern. The females were also identified by size, with the largest female  
390 designated “Female 1” and the smallest “Female 4”. A single scorer performed all manual activity  
391 logging, to avoid inter-individual differences in evaluation of criteria. Data for each fish was  
392 exported in the “Aggregated Events” format, and then analyzed using a custom-made Python  
393 script (v3.11.3) to extract hourly measurements of locomotion. Rest bouts were calculated from  
394 the aggregated movement data, with any period of inactivity greater than 60 seconds considered  
395 a rest bout.

396

### 397 **Statistical Analysis**

398 To identify differences between multiple conditions, such as activity in the light versus dark, or  
399 between juvenile and adult behavior, a two-way ANOVA was carried out, and followed by Šidák's  
400 multiple comparisons post hoc test. All statistical testing was carried out using InStat software  
401 (GraphPad Prism 9.5).

402

403 Diurnality was calculated as described previously, as an “activity change ratio”, with  $A_R = \frac{D-N}{D+N}$ ,  
404 where D and N are average hourly activity during the day and night. Crepuscularity was calculated  
405 as  $C_R = \frac{C}{NC} - 1$ , where C is equal to the average activity in the hours following light transitions  
406 (i.e. dawn and dusk), and NC is equal to the average activity across the rest of the day. In this  
407 formulation, 0 represents no change in activity following a light transition, and 1 represents a  
408 100% increase in activity levels<sup>24</sup>.

409

### 410 **References**

- 411 1. Keene, A.C., and Duboue, E.R. (2018). The origins and evolution of sleep. *J Exp Biol.*  
412 10.1242/jeb.159533.
- 413 2. Joiner, W.J. (2016). Unraveling the Evolutionary Determinants of Sleep. *Current Biology*  
414 26, R1073–R1087. 10.1016/j.cub.2016.08.068.
- 415 3. Bhadra, U., Thakkar, N., Das, P., and Pal Bhadra, M. (2017). Evolution of circadian  
416 rhythms: from bacteria to human. *Sleep Med* 35, 49–61. 10.1016/j.sleep.2017.04.008.

- 417 4. Foulkes, N.S., Whitmore, D., Vallone, D., and Bertolucci, C. (2016). Studying the Evolution  
418 of the Vertebrate Circadian Clock: The Power of Fish as Comparative Models. *Adv Genet*  
419 *95*, 1–30. [10.1016/bs.adgen.2016.05.002](https://doi.org/10.1016/bs.adgen.2016.05.002).
- 420 5. Kronfeld-Schor, N., Visser, M.E., Salis, L., and van Gils, J.A. (2017). Chronobiology of  
421 interspecific interactions in a changing world. *Philos Trans R Soc Lond B Biol Sci* *372*.  
422 [10.1098/rstb.2016.0248](https://doi.org/10.1098/rstb.2016.0248).
- 423 6. Bass, J., and Lazar, M.A. (2016). Circadian time signatures of fitness and disease. *Science*  
424 *354*, 994–999. [10.1126/science.aah4965](https://doi.org/10.1126/science.aah4965).
- 425 7. Mohawk, J.A., Green, C.B., and Takahashi, J.S. (2012). Central and Peripheral Circadian  
426 Clocks in Mammals. *Annu Rev Neurosci* *35*, 445–462. [10.1146/annurev-neuro-060909-153128](https://doi.org/10.1146/annurev-neuro-060909-153128).
- 427  
428 8. Mattis, J., and Sehgal, A. (2016). Circadian Rhythms, Sleep, and Disorders of Aging.  
429 *Trends in Endocrinology and Metabolism* *27*, 192–203. [10.1016/j.tem.2016.02.003](https://doi.org/10.1016/j.tem.2016.02.003).
- 430 9. Froese, R., and Pauley, D. [www.fishbase.org](http://www.fishbase.org). Fishbase.
- 431 10. Sánchez-Vázquez, F.J., Madrid, J.A., Zamora, S., Iigo, M., and Tabata, M. (1996). Demand  
432 feeding and locomotor circadian rhythms in the goldfish, *Carassius auratus*: dual and  
433 independent phasing. *Physiol Behav* *60*, 665–674. [10.1016/s0031-9384\(96\)80046-1](https://doi.org/10.1016/s0031-9384(96)80046-1).
- 434 11. Duboué, E.R., Keene, A.C., and Borowsky, R.L. (2011). Evolutionary convergence on sleep  
435 loss in cavefish populations. *Current Biology* *21*, 671–676. [10.1016/j.cub.2011.03.020](https://doi.org/10.1016/j.cub.2011.03.020).
- 436 12. Hurd, M.W., Debruyne, J., Straume, M., and Cahill, G.M. (1998). Circadian rhythms of  
437 locomotor activity in zebrafish. *Physiol Behav* *65*, 465–472. [10.1016/s0031-9384\(98\)00183-8](https://doi.org/10.1016/s0031-9384(98)00183-8).
- 438  
439 13. Zhdanova, I. V., Wang, S.Y., Leclair, O.U., and Danilova, N.P. (2001). Melatonin promotes  
440 sleep-like state in zebrafish. *Brain Res* *903*, 263–268. [10.1016/S0006-8993\(01\)02444-1](https://doi.org/10.1016/S0006-8993(01)02444-1).
- 441 14. Herrero, M.J., Pascual, M., Madrid, J.A., and Sánchez-Vázquez, F.J. (2005). Demand-  
442 feeding rhythms and feeding-entrainment of locomotor activity rhythms in tench (*Tinca*  
443 *tinca*). *Physiol Behav* *84*, 595–605. [10.1016/j.physbeh.2005.02.015](https://doi.org/10.1016/j.physbeh.2005.02.015).
- 444 15. Mack, K.L., Jaggard, J.B., Persons, J.L., Roback, E.Y., Passow, C.N., Stanhope, B.A.,  
445 Ferrufino, E., Tsuchiya, D., Smith, S.E., Slaughter, B.D., et al. (2021). Repeated evolution  
446 of circadian clock dysregulation in cavefish populations. *PLoS Genet* *17*, 1–32.  
447 [10.1371/journal.pgen.1009642](https://doi.org/10.1371/journal.pgen.1009642).
- 448 16. Cavallari, N., Frigato, E., Vallone, D., Fröhlich, N., Lopez-Olmeda, J.F., Foà, A., Berti, R.,  
449 Sánchez-Vázquez, F.J., Bertolucci, C., and Foulkes, N.S. (2011). A blind circadian clock in  
450 cavefish reveals that opsins mediate peripheral clock photoreception. *PLoS Biol* *9*,  
451 [e1001142](https://doi.org/10.1371/journal.pbio.1001142). [10.1371/journal.pbio.1001142](https://doi.org/10.1371/journal.pbio.1001142).
- 452 17. Beale, A., Guibal, C., Tamai, T.K., Klotz, L., Cowen, S., Peyric, E., Reynoso, V.H.,  
453 Yamamoto, Y., and Whitmore, D. (2013). Circadian rhythms in Mexican blind cavefish  
454 *Astyanax mexicanus* in the lab and in the field. *Nat Commun* *4*, 2769.  
455 [10.1038/ncomms3769](https://doi.org/10.1038/ncomms3769).
- 456 18. Ceinos, R.M., Frigato, E., Pagano, C., Fröhlich, N., Negrini, P., Cavallari, N., Vallone, D.,  
457 Fuselli, S., Bertolucci, C., and Foulkes, N.S. (2018). Mutations in blind cavefish target the  
458 light-regulated circadian clock gene, *period 2*. *Sci Rep* *8*, 8754. [10.1038/s41598-018-27080-2](https://doi.org/10.1038/s41598-018-27080-2).  
459

- 460 19. Salzburger, W. (2018). Understanding explosive diversification through cichlid fish  
461 genomics. *Nat Rev Genet* 19, 705–717. 10.1038/s41576-018-0043-9.
- 462 20. Kornfield, I., and Smith, P.F. (2000). African cichlid fishes: Model systems for evolutionary  
463 biology. *Annu Rev Ecol Syst* 31, 163–196. 10.1146/annurev.ecolsys.31.1.163.
- 464 21. Kocher, T.D. (2004). Adaptive evolution and explosive speciation: The cichlid fish model.  
465 *Nat Rev Genet* 5, 288–298. 10.1038/nrg1316.
- 466 22. Fryer, G., and Iles, T.D. (1972). The Cichlid Fishes of the Great Lakes of Africa. Their  
467 Biology and Evolution (Oliver and Boyd).
- 468 23. Arnegard, M.E., and Carlson, B.A. (2005). Electric organ discharge patterns during group  
469 hunting by a mormyrid fish. *Proc Biol Sci* 272, 1305–1314. 10.1098/rspb.2005.3101.
- 470 24. Lloyd, E., Chhouk, B., Conith, A.J., Keene, A.C., and Albertson, R.C. (2021). Diversity in  
471 rest-activity patterns among Lake Malawi cichlid fishes suggests a novel axis of habitat  
472 partitioning. *J Exp Biol* 224. 10.1242/jeb.242186.
- 473 25. Ribbink, A.J., Marsh, B.A., Marsh, A.C., Ribbink, A.C., and Sharp, B.J. (1983). A preliminary  
474 survey of the cichlid fishes of rocky habitats in Lake Malawi. *South African Journal of*  
475 *Zoology* 18, 149–310. 10.1080/02541858.1983.11447831.
- 476 26. Konings, A. (2001). *Malawi Cichlids in Their Natural Habitat* 3rd Editin. (Cichlid Press).
- 477 27. Yoshizawa, M., Robinson, B.G., Duboué, E.R., Masek, P., Jaggard, J.B.J., O’Quin, K.E.K.,  
478 Borowsky, R.L.R., Jeffery, W.R.W., Keene, A.C.A., Duboue, E., et al. (2015). Distinct  
479 genetic architecture underlies the emergence of sleep loss and prey-seeking behavior in  
480 the Mexican cavefish. *BMC Biol* 20, 15. 10.1186/s12915-015-0119-3.
- 481 28. Jaggard, J.B., Stahl, B.A., Lloyd, E., Prober, D.A., Duboue, E.R., and Keene, A.C. (2018).  
482 Hypocretin underlies the evolution of sleep loss in the Mexican cavefish. *Elife* 7.  
483 10.7554/eLife.32637.
- 484 29. Yokogawa, T., Marin, W., Faraco, J., Pézeron, G., Appelbaum, L., Zhang, J., Rosa, F.,  
485 Mourrain, P., and Mignot, E. (2007). Characterization of sleep in zebrafish and insomnia  
486 in hypocretin receptor mutants. *PLoS Biol* 5, 2379–2397. 10.1371/journal.pbio.0050277.
- 487 30. Jaggard, J.B., Lloyd, E., Lopatto, A., Duboue, E.R., and Keene, A.C. (2019). Automated  
488 Measurements of Sleep and Locomotor Activity in Mexican Cavefish. *J Vis Exp*.  
489 10.3791/59198.
- 490 31. Tunbak, H., Vazquez-Prada, M., Ryan, T.M., Kampff, A.R., and Dreosti, E. (2020). Whole-  
491 brain mapping of socially isolated zebrafish reveals that lonely fish are not loners. *Elife* 9.  
492 10.7554/eLife.55863.
- 493 32. Patch, A., Paz, A., Holt, K.J., Duboué, E.R., Keene, A.C., Kowalko, J.E., and Fily, Y. (2022).  
494 Kinematic analysis of social interactions deconstructs the evolved loss of schooling  
495 behavior in cavefish. *PLoS One* 17, e0265894. 10.1371/journal.pone.0265894.
- 496 33. Gallego-Abenza, M., Boucherie, P.H., and Bugnyar, T. (2022). Early social environment  
497 affects attention to social cues in juvenile common ravens, *Corvus corax*. *R Soc Open Sci*  
498 9, 220132. 10.1098/rsos.220132.
- 499 34. Guo, H., Näslund, J., Thomassen, S.T., and Larsen, M.H. (2022). Social isolation affects  
500 intra-specific interaction behaviour and reduces the size of the cerebellar brain region in  
501 juvenile Atlantic salmon *Salmo salar*. *J Fish Biol* 101, 711–721. 10.1111/jfb.15142.

- 502 35. Solomon-Lane, T.K., and Hofmann, H.A. (2019). Early-life social environment alters  
503 juvenile behavior and neuroendocrine function in a highly social cichlid fish. *Horm Behav*  
504 *115*, 104552. [10.1016/j.yhbeh.2019.06.016](https://doi.org/10.1016/j.yhbeh.2019.06.016).
- 505 36. Friard, O., and Gamba, M. (2016). BORIS: A free, versatile open-source event-logging  
506 software for video/audio coding and live observations. *Methods Ecol Evol* *7*.  
507 [10.1111/2041-210X.12584](https://doi.org/10.1111/2041-210X.12584).
- 508 37. Frank, M.G. (2020). The Ontogenesis of Mammalian Sleep: Form and Function. *Curr Sleep*  
509 *Med Rep* *6*, 267–279. [10.1007/s40675-020-00190-y](https://doi.org/10.1007/s40675-020-00190-y).
- 510 38. Brown, E.B., Slocumb, M.E., Szuperak, M., Kerbs, A., Gibbs, A.G., Kayser, M.S., and Keene,  
511 A.C. (2019). Starvation resistance is associated with developmentally specified changes in  
512 sleep, feeding and metabolic rate. *Journal of Experimental Biology* *222*.  
513 [10.1242/jeb.191049](https://doi.org/10.1242/jeb.191049).
- 514 39. Szuperak, M., Churgin, M.A., Borja, A.J., Raizen, D.M., Fang-Yen, C., and Kayser, M.S.  
515 (2018). A sleep state in *Drosophila* larvae required for neural stem cell proliferation. *Elife*  
516 *7*. [10.7554/eLife.33220](https://doi.org/10.7554/eLife.33220).
- 517 40. Maruska, K.P., Anselmo, C.M., King, T., Mobley, R.B., Ray, E.J., and Wayne, R. (2022).  
518 Endocrine and neuroendocrine regulation of social status in cichlid fishes. *Horm Behav*  
519 *139*, 105110. [10.1016/j.yhbeh.2022.105110](https://doi.org/10.1016/j.yhbeh.2022.105110).
- 520 41. Steindal, I.A.F., and Whitmore, D. (2020). Zebrafish Circadian Clock Entrainment and the  
521 Importance of Broad Spectral Light Sensitivity. *Front Physiol* *11*, 1002.  
522 [10.3389/fphys.2020.01002](https://doi.org/10.3389/fphys.2020.01002).
- 523 42. Moore, H.A., and Whitmore, D. (2014). Circadian rhythmicity and light sensitivity of the  
524 zebrafish brain. *PLoS One* *9*, e86176. [10.1371/journal.pone.0086176](https://doi.org/10.1371/journal.pone.0086176).
- 525 43. Radwan, B., Yanez Touzet, A., Hammami, S., and Chaudhury, D. (2021). Prolonged  
526 Exposure to Social Stress Impairs Homeostatic Sleep Regulation. *Front Neurosci* *15*,  
527 633955. [10.3389/fnins.2021.633955](https://doi.org/10.3389/fnins.2021.633955).
- 528 44. Ota, S.M., Hut, R.A., Riede, S.J., Crosby, P., Suchecki, D., and Meerlo, P. (2020). Social  
529 stress and glucocorticoids alter PERIOD2 rhythmicity in the liver, but not in the  
530 suprachiasmatic nucleus. *Horm Behav* *120*, 104683. [10.1016/j.yhbeh.2020.104683](https://doi.org/10.1016/j.yhbeh.2020.104683).
- 531 45. Hesse, S., and Thünken, T. (2014). Growth and social behavior in a cichlid fish are  
532 affected by social rearing environment and kinship. *Naturwissenschaften* *101*, 273–283.  
533 [10.1007/s00114-014-1154-6](https://doi.org/10.1007/s00114-014-1154-6).
- 534 46. Li, W., Wang, Z., Syed, S., Lyu, C., Lincoln, S., O’Neil, J., Nguyen, A.D., Feng, I., and Young,  
535 M.W. (2021). Chronic social isolation signals starvation and reduces sleep in *Drosophila*.  
536 *Nature* *597*, 239–244. [10.1038/s41586-021-03837-0](https://doi.org/10.1038/s41586-021-03837-0).
- 537 47. Wang, Z., Lincoln, S., Nguyen, A.D., Li, W., and Young, M.W. (2022). Chronic sleep loss  
538 disrupts rhythmic gene expression in *Drosophila*. *Front Physiol* *13*, 1048751.  
539 [10.3389/fphys.2022.1048751](https://doi.org/10.3389/fphys.2022.1048751).
- 540 48. Schwalbe, M.A.B., Bassett, D.K., and Webb, J.F. (2012). Feeding in the dark: lateral-line-  
541 mediated prey detection in the peacock cichlid *Aulonocara stuartgranti*. *J Exp Biol* *215*,  
542 2060–2071. [10.1242/jeb.065920](https://doi.org/10.1242/jeb.065920).
- 543 49. Campanella, F., Auster, P.J., Taylor, J.C., and Muñoz, R.C. (2019). Dynamics of predator-  
544 prey habitat use and behavioral interactions over diel periods at sub-tropical reefs. *PLoS*  
545 *One* *14*, e0211886. [10.1371/journal.pone.0211886](https://doi.org/10.1371/journal.pone.0211886).

- 546 50. van Oosterhout, F., Fisher, S.P., van Diepen, H.C., Watson, T.S., Houben, T., VanderLeest,  
547 H.T., Thompson, S., Peirson, S.N., Foster, R.G., and Meijer, J.H. (2012). Ultraviolet light  
548 provides a major input to non-image-forming light detection in mice. *Curr Biol* 22, 1397–  
549 1402. [10.1016/j.cub.2012.05.032](https://doi.org/10.1016/j.cub.2012.05.032).
- 550 51. Helfman, G.S. (1986). Fish Behaviour by Day, Night and Twilight. In *The Behaviour of*  
551 *Teleost Fishes* (Springer US), pp. 366–387. [10.1007/978-1-4684-8261-4\\_14](https://doi.org/10.1007/978-1-4684-8261-4_14).
- 552 52. Walmsley, L., Hanna, L., Mouland, J., Martial, F., West, A., Smedley, A.R., Bechtold, D.A.,  
553 Webb, A.R., Lucas, R.J., and Brown, T.M. (2015). Colour as a signal for entraining the  
554 mammalian circadian clock. *PLoS Biol* 13, e1002127. [10.1371/journal.pbio.1002127](https://doi.org/10.1371/journal.pbio.1002127).
- 555 53. Mathis, A., Mamidanna, P., Cury, K.M., Abe, T., Murthy, V.N., Mathis, M.W., and Bethge,  
556 M. (2018). DeepLabCut: markerless pose estimation of user-defined body parts with  
557 deep learning. *Nat Neurosci* 21, 1281–1289. [10.1038/s41593-018-0209-y](https://doi.org/10.1038/s41593-018-0209-y).
- 558 54. Romero-Ferrero, F., Bergomi, M.G., Hinz, R.C., Heras, F.J.H., and de Polavieja, G.G.  
559 (2019). idtracker.ai: tracking all individuals in small or large collectives of unmarked  
560 animals. *Nat Methods* 16, 179–182. [10.1038/s41592-018-0295-5](https://doi.org/10.1038/s41592-018-0295-5).
- 561 55. Wiltschko, A.B., Tsukahara, T., Zeine, A., Anyoha, R., Gillis, W.F., Markowitz, J.E.,  
562 Peterson, R.E., Katon, J., Johnson, M.J., and Datta, S.R. (2020). Revealing the structure of  
563 pharmacobehavioral space through motion sequencing. *Nat Neurosci* 23, 1433–1443.  
564 [10.1038/s41593-020-00706-3](https://doi.org/10.1038/s41593-020-00706-3).
- 565 56. Arble, D.M.D.M., Bass, J., Behn, C.D.C.D., Butler, M.P.M.P., Challet, E., Czeisler, C.,  
566 Depner, C.M., Elmquist, J., Franken, P., Grandner, M.A., et al. (2015). Impact of Sleep and  
567 Circadian Disruption on Energy Balance and Diabetes : A Summary of Workshop  
568 Discussions. *Sleep* 38, 1849–1860. [10.5665/sleep.5226](https://doi.org/10.5665/sleep.5226).
- 569 57. Patke, A., Young, M.W., and Axelrod, S. (2020). Molecular mechanisms and physiological  
570 importance of circadian rhythms. *Nat Rev Mol Cell Biol* 21, 67–84. [10.1038/s41580-019-0179-2](https://doi.org/10.1038/s41580-019-0179-2).  
571  
572  
573

574 **Figure Legends**

575

576 **Figure 1. Variation in cichlid activity levels is conserved throughout development. A.**

577 Images of early juvenile (left) and adult (right) cichlid species used in the present study.

578 Juveniles were tested and photographed between 3-4 weeks post-fertilization, shortly after the

579 depletion of the yolk sac and at the earliest free-swimming stage. Adults were tested and

580 photographed at full maturity, after the development of nuptial colors. White Scale Bar

581 (Juveniles) = 1 mm. Black Scale Bar (Adults) = 1 cm. **B.** Total locomotion of juvenile cichlids

582 over a 24 hour period. There is significant variation in total locomotion in juvenile cichlids

583 (ANOVA:  $F_{5, 190} = 15.99, p < 0.0001$ ). **C.** Total locomotion of adult cichlids over a 24 hour period.

584 There is significant variation in total locomotion in adult cichlids (ANOVA:  $F_{5, 67} = 6.42,$

585  $p < 0.0001$ ) **D.** Correlation between 24-hour locomotion in juveniles and adults. There is a

586 significant correlation between juvenile and adult locomotion ( $r^2 = 0.70, p = 0.0388$ )

587 **Figure 2. Ontogeny of behavioral rhythms in locomotion. A.** Locomotion profiles of juvenile

588 cichlids over 24 hours. Shaded area indicates dark period. **B.** Locomotion profiles of adult

589 cichlids over 24 hours. Shaded area indicates dark period. **C.** Average hourly locomotion of

590 juvenile cichlids during the day and night. Juvenile cichlids exhibit diurnal (*A. calliptera*, *L.*

591 *caeruleus*, *M. heterochromis*, *T. kumwera*) or nocturnal (*A. stuartgranti*, *N. venustus*) activity

592 patterns (two-way ANOVA:  $F_{5, 190} = 36.54, p < 0.0001$ ). **D.** Average hourly locomotion of juvenile

593 cichlids during the day and night. Adult cichlids lack behavioral rhythms when tested in isolation.

594 **E.** Strength of behavioral rhythms in juvenile and adult cichlids. 1 indicates total diurnality, -1

595 indicates total nocturnality. Behavioral rhythms are present in juveniles but not adults (two-way

596 ANOVA:  $F_{5, 280} = 16.20, p < 0.0001$ ).

597 **Figure 3. Ontogeny of behavioral rhythms in rest. A.** Rest profiles in juvenile cichlids over 24

598 hours. Shaded area indicates dark period. **B.** Rest profiles in adult cichlids over 24 hours.

599 Shaded area indicates dark period. **C.** Total rest amounts over 24 hours in juvenile cichlids.

600 There is significant variation in total rest amount in juvenile cichlids. (ANOVA:  $F_{5, 190} = 42.4,$

601  $p < 0.0001$ ). **D.** Total rest amounts over 24 hours in adult cichlids. There is significant variation in

602 total rest amount in adult cichlids (ANOVA:  $F_{5, 67} = 8.792, p < 0.0001$ ). **E.** Correlation between

603 juvenile and adult rest amounts. There is significant correlation between juvenile and adult rest

604 ( $r^2 = 0.82, p < 0.0128$ ). **F.** Average hourly rest amount of juvenile cichlids during the day and

605 night. Juvenile cichlids exhibit diurnal (*A. calliptera*, *L. caeruleus*, *T. kumwera*, *N. venustus*) or

606 nocturnal (*A. stuartgranti*) rest patterns (two-way ANOVA:  $F_{5, 358} = 10.95$ ,  $p < 0.0001$ ). **G.** Average  
607 hourly rest amount of adult cichlids lack behavioral rhythms in rest amount.

608 **Figure 4. Social context restores rhythms in diurnal cichlids.** **A.** Schematic of test setup.  
609 Adult cichlids are transferred to a 10-gallon testing aquarium, acclimated overnight, and then  
610 recorded for 24 hours. **B.** Average locomotion of cichlid groups over 24 hours. Shaded area  
611 indicates dark period. **C.** Average hourly locomotion of group housed cichlids, during the day  
612 and night. **C.** Average hourly locomotion of group housed cichlids during the day and night,  
613 grouped into diurnal and nocturnal species. Group housing restores rhythmic behavior in  
614 diurnal, but not nocturnal species (two-way ANOVA:  $F_{1,6} = 11.23$   $p = 0.0154$ ). Colors of data  
615 points indicate species.

616 **Figure 5. Individual variation in behavioral rhythms in a social context.** **A.** Ethogram of  
617 active swimming behavior of *L. caeruleus* over 24 hours, in a social context. Colored regions  
618 indicate periods of active swimming. Shaded area indicates dark period. **B.** Profile of locomotion  
619 in group housed *L. caeruleus*, quantified as minutes of active swimming per hour. Shaded area  
620 indicates dark period. **C.** Average hourly locomotor activity of group housed *L. caeruleus* during  
621 the day and night. Group housed *L. caeruleus* are significantly more active during the day  
622 (Paired t-test:  $t_5 = 6.413$ ,  $p = 0.0014$ ). **D.** Rest profile of group housed *L. caeruleus* over 24  
623 hours. Shaded area indicates dark period. **E.** Average hourly rest of group housed *L. caeruleus*  
624 during the day and night. Group housed *L. caeruleus* consolidate rest during the dark period  
625 (Paired t-test:  $t_5 = 5.198$ ,  $p = 0.0035$ ).

626

627

628



## 629 Supplemental Figures

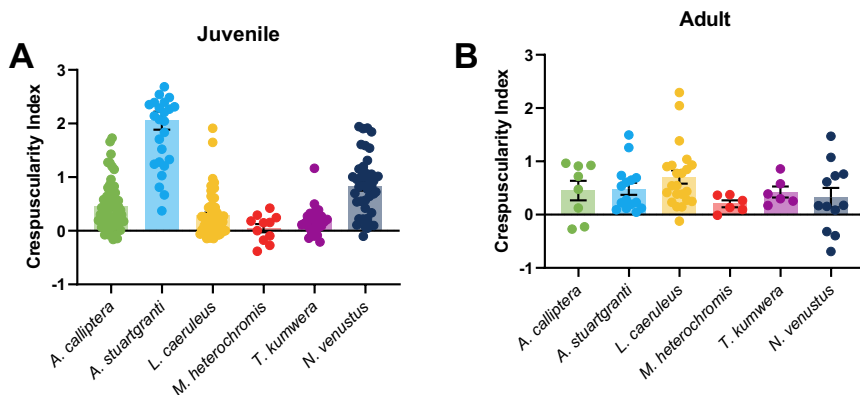

**Supplemental Figure 1. Ontogeny of crepuscular behavior.** **A.** Crepuscularity index of juvenile cichlids. There is significant variation in degree of crepuscular behavior among juvenile cichlids (ANOVA:  $F_{5, 190} = 55.04$ ,  $p < 0.0001$ ). **B.** Crepuscularity index of adult cichlids. There is no significant variation in degree of crepuscular behavior in adult cichlids.
